# Supplementary material for: A First Generation Microsatellite- and SNP-Based Linkage Map of Jatropha
Source: PLoS One. 2011 Aug 25;6(8):e23632. doi: 10.1371/journal.pone.0023632 (PMC3161998; doi:10.1371/journal.pone.0023632)
Supplement: Table S2 — Detailed results of comparative genome analysis by BlastX. (XLS) [file pone.0023632.s002.xls]

## Sheet: BlastX results 
Supplementary Table 2. Detailed results of comparative genome analysis by BlastX
Jatropha			Ricinus communis				Populus trichocarpa				Arabidopsis thaliana
Marker name	position (cM)	Acc id	Score(bits)	e value	Acc id	Protein description following BlastX search	Score(bits)	e value	Acc id	Protein description following BlastX search	Score(bits)	e value	Acc id	Position	Protein description following BlastX search
LG01-eSNP0894	0	HR864163	61	5e-10	EEF31660.1	conserved hypothetical protein	52.4	2e-07	jgi|Poptr1_1|777108	fgenesh4_pg.C_LG_XVI000350	53	1e-07	AT3G58010.1	chr3:21486926-21488440	Identical to Probable plastid-lipid-associated protein 9, chloroplast precursor (PAP9)
LG01-eSNP0836	1	HR864077	153	7e-38	EEF32280.1	conserved hypothetical protein	139	1e-33	jgi|Poptr1_1|255455	gw1.XVI.1394.1	92	2e-19	AT5G04040.1	chr5:1090345-1093002	SDP1 | SDP1 (SUGAR-DEPENDENT1); triacylglycerol
LG01-eSNP0815	2.1	HR864072	89	2e-18	EEF33735.1	conserved hypothetical protein	92	3e-19	jgi|Poptr1_1|836253	fgenesh4_pm.C_280125	91	6e-19	AT2G36630.1	chr2:15359846-15362129	similar to unknown protein [Arabidopsis thaliana] {TAIR:AT2G25737.1); similar to unnamed protein product [Vitis vinifera] (GB:CAO16008.1); contains InterPro domain Protein of unknown function DUF81; (InterPro:IPR002781)
LG01-eSNP0027	69.5	HR864129	107	5e-24	EEF30324.1	mitochondrial oxoglutarate/malate carrierprotein, putative	106	1e-23	jgi|Poptr1_1|547596	eugene3.00010037	96	1e-20	AT5G19760.1	chr5:6679593-6681847	dicarboxylate/tricarboxylate carrier (DTC)
LG01-eSNP0292	78.9	HR864065	95	4e-20	EEF40789.1	WD-repeat protein, putative	94	7e-20	jgi|Poptr1_1|747757	Genewise1_v1.C_9650001	62	4e-10	AT4G18905.1	chr4:10360245-10363002	transducin family protein / WD-40 repeat family protein
LG01-eSNP0047	76.8	HR863988	173	7e-44	EEF34254.1	transferase, transferring glycosyl groups,putative	172	2e-43	jgi|Poptr1_1|814785	fgenesh4_pg.C_LG_I0109	169	1e-42	AT5G13000.1	chr5:4110680-4121205	Symbols: GSL12, ATGSL12 | ATGSL12 (GLUCAN SYNTHASE-LIKE 12); 1,3-beta-glucan synthase/ transferase, transferring glycosyl groups
LG01-Jatr472	81	JF502080	57	9e-09	EEF38105.1	hypothetical protein	53	2e-07	jgi|Poptr1_1|753378	fgenesh4_pg.C_LG_I002981
LG01-Jatr1047	86.2	EU664973	54	1e-07	EEF34141.1	catalytic, putative	50	9e-07	jgi|Poptr1_1|827604	fgenesh4_pg.C_1070035
LG01-eSNP0866	85.2	HR864084	165	2e-41	EEF30672.1	ubiquitin conjugating enzyme, putative	158	2e-39	jgi|Poptr1_1|235877	gw1.XI.3857.1	145	3e-35	AT3G15355.1	chr3:5183865-5186676	UBC25, PFU1 | PFU1/UBC25 (UBIQUITIN-CONJUGATING ENZYME 25); small conjugating protein ligase
LG01-Jatr908	94.6	EU664925	63	1e-10	EEF32474.1	dihydrolipoamide succinyltransferase component	63	1e-10	jgi|Poptr1_1|727965	Genewise1_v1.C_LG_XI2803	61	7e-10	AT5G55070.1	chr5:22364863-22367635	2-oxoacid dehydrogenase family protein
LG01-eSNP0916	94.6	HR864094	135	2e-32	EEF39556.1	electron transfer flavoprotein-ubiquinoneoxidoreductase	132	2e-31	jgi|Poptr1_1|817727	fgenesh4_pg.C_LG_IV0080	124	4e-29	AT5G54770.1	chr5:22364863-22367635	TZ, THI1 | THI1 (THIAZOLE REQUIRING)
LG01-Jcuint253	100.8	JF502156	158	2e-39	EEF44220.1	acid phosphatase, putative	153	7e-38	jgi|Poptr1_1|778303	fgenesh4_pg.C_LG_XVII000182	137	7e-33	AT3G07130.1	chr3:2255769-2257987	ATPAP15, PAP15 | ATPAP15/PAP15 (purple acid phosphatase 15); acid phosphatase/ protein serine/threonine phosphatase
LG01-eSNP0274	117.9	HR864153	82	4e-16	EEF39621.1	conserved hypothetical protein	78	4e-15	jgi|Poptr1_1|805897	fgenesh4_pm.C_LG_XI000172	59	3e-09	AT1G55915.1	chr1:20911328-20913094	zinc ion binding
LG01-eSNP0055	149.8	HR863992	123	1e-28	EEF45234.1	acireductone dioxygenase, putative	116	1e-26	jgi|Poptr1_1|720244	Genewise1_v1.C_LG_VIII0915	110	9e-25	AT4G14716.1	chr4:8430479-8431862	ATARD1 | ATARD1; acireductone dioxygenase [iron(II)-requiring]/ metal ion binding
LG01-Jatr159	147.7	EU664745	54	6e-08	EEF45232.1	conserved hypothetical protein	57	1e-08	jgi|Poptr1_1|564880	eugene3.00081475
LG01-Jatr720	149.8	EU664847	72	2e-13	EEF45227.1	coated vesicle membrane protein,putative	69	2e-12	jgi|Poptr1_1|821950	fgenesh4_pg.C_LG_X0743	67	1e-11	AT3G22845.1	chr3:8087380-8088557	emp24/gp25L/p24 protein-related
LG01-eSNP0886	150.8	HR864090	58	4e-09	EEF45248.1	40S ribosomal protein S3a, putative	60	1e-09	jgi|Poptr1_1|421279	gw1.VIII.2707.1	55	4e-08	AT3G04840.1	chr3:1329757-1331424	40S ribosomal protein S3A (RPS3aA)
LG01-eSNP0845	179.2	HR864079	72	3e-13	EEF45562.1	cytoplasmic dynein light chain,putative
LG01-Jatr805	187.5	EU664879	100	1e-21	EEF43156.1	yth domain-containing protein, putative					86	2e-17	AT3G17330.1	chr3:5917259-5919464	ECT6 (evolutionarily conserved C-terminal region 6)
LG02-eSNP0262	0	HR864054	77	1e-14	EEF49661.1	alpha-galactosidase/alpha-n-acetylgalactosaminidase	63	1e-10	jgi|Poptr1_1|228333	gw1.X.3030.1	66	2e-11	AT5G08380.1	chr5:2694852-2697617	ATAGAL1 (ARABIDOPSIS THALIANA ALPHA-GALACTOSIDASE 1); alpha-galactosidase
LG02-Jatr333	6.3	EU664775	58	6e-06	EEF49643.1	protein phsophatase-2a, putative	58	6e-09	jgi|Poptr1_1|83389	fgenesh4_pm.C_LG_X0943	57	1e-08	AT3G19980.1	chr3:6962014-6964767	ATFYPP3(SERINE/THREONINE PROTEIN PHOSPHATASE); protein serine/threonine phosphatase
LG02-eSNP0887	12.6	HR864091	166	8e-42	EEF36800.1	DNA-directed RNA polymerase III subunit,putative	149	1e-36	jgi|Poptr1_1|250657	gw1.XV.93.1	153	1e-37	AT5G45140.1	chr5:18264643-18274940	NRPC2 (nuclear RNA polymerase C 2);DNA binding / DNA-directed RNA polymerase
LG02-eSNP0078	12.6	HR864133	52	2e-07	EEF36811.1	cysteine protease inhibitor, putative	58	6e-09	jgi|Poptr1_1|711772	Genewise1_v1.C_LG_III0367	54	8e-08	AT3G12490.2	chr3:3960530-3961883	cysteine protease inhibitor, putative
LG02-eSNP0226	32.3	HR864149	108	3e-24	EEF46451.1	cytoplasmic dynein light chain,putative	104	5e-23	jgi|Poptr1_1|830690	fgenesh4_pm.C_LG_III0116	96	2e-20	AT1G52250.1	chr1:19462513-19462904	dynein light chain type 1 family protein
LG02-eSNP0206	35.4	HR864043	147	4e-36	EEF46477.1	kif4, putative	143	1e-34	jgi|Poptr1_1|712368	Genewise1_v1.C_LG_III1820	114	7e-26	AT3G16060.1	chr3:5447509-5451202	kinesin motor family protein
LG02-eSNP0280	51.2	HR864060	158	2e-39	EEF44789.1	phopholipase d alpha, putative	169	1e-42	jgi|Poptr1_1|810176	fgenesh4_pm.C_scaffold_44000016	162	1e-40	AT3G15730.1	chr3:5330842-5333481	PLDALPHA1 (PHOSPHOLIPASE D ALPHA 1); phospholipase D
LG02-SNP019-2	58.5	HR864121	60	1e-09	EEF49306.1	dead box ATP-dependent RNA helicase, putative	56	2e-08	jgi|Poptr1_1|789166	fgenesh4_pg.C_scaffold_498000004	56	2e-08	AT3G02060.2	chr3:354419-358326	DEAD/DEAH box helicase, putative
LG02-Jatr1035	79.7	EU664970	55	4e-08	EEF41095.1	pentatricopeptide repeat-containing protein,putative	57	7e-09	jgi|Poptr1_1|200588	gw1.IX.1053.1	53	2e-07	AT2G17033.2	chr2:7408287-7410289	pentatricopeptide (PPR) repeat-containing protein
LG02-eSNP0116	83.9	HR864011	158	3e-39	EEF28034.1	rubisco subunit binding-protein alpha subunit,ruba, putative	159	1e-39	jgi|Poptr1_1|827287	fgenesh4_pg.C_660263	152	2e-37	AT2G28000.1	chr2:11933680-11936261	CPN60A (chloroplast / 60 kDa chaperonin alpha subunit); ATP binding / protein binding / unfolded protein binding
LG02-Jatr124	88.1	EU664731	54	1e-07	EEF38522.1	DNA binding protein, putative
LG02-eSNP0088	91.2	HR864006	141	4e-34	EEF32451.1	conserved hypothetical protein	129	1e-30	jgi|Poptr1_1|204274	gw1.IX.4739.1	97	1e-20	AT1G07990.1	chr1:2477410-2482895	SIT4 phosphatase-associated family protein
LG02-Jatr964	91.2	EU664943	47	1e-05	EEF32452.1	conserved hypothetical protein
LG02-eSNP0089	92.2	HR864135	156	1e-38	EEF32093.1	4-hydroxy-3-methylbut-2-en-1-yl diphosphatesynthase, putative	150	5e-37	jgi|Poptr1_1|836719	fgenesh4_pm.C_660111	147	4e-36	AT5G60600.3	chr5:24376673-24380245	GcpE (CHLOROPLAST BIOGENESIS 4)
LG02-eSNP0082	95.4	HR864004	165	2e-41	EEF29564.1	calcium-transporting atpase 4, endoplasmic reticulum-type, putative	150	8e-37	jgi|Poptr1_1|271920	gw1.148.178.1	148	2e-36	AT1G07670.1	chr1:2370302-2374193	calcium-transporting ATPase
LG02-eSNP0099	99.5	HR864008	90	1e-18	EEF27845.1	transcription factor, putative	120	5e-28	jgi|Poptr1_1|780752	fgenesh4_pg.C_LG_XIX000891	91	6e-19	AT1G05710.3	chr1:1716197-1717022	ethylene-responsive protein, putative
LG02-eSNP0286	100.9	HR864155	64	8e-11	EEF31274.1	60S ribosomal protein L23a, putative	61	7e-10	jgi|Poptr1_1|822509	fgenesh4_pg.C_LG_X1891	49	2e-06	AT2G39460.1	chr2:16482127-16482982	ATRPL23A (RIBOSOMAL PROTEIN L23A); RNA binding / structural constituent of ribosome
LG02-eSNP0871	103.7	HR864086	85	3e-17	EEF31818.1	conserved hypothetical protein	83	2e-16	jgi|Poptr1_1|835993	fgenesh4_pm.C_LG_XVIII0422	80	8e-16	AT4G29850.1	chr4:14601824-14602880	similar to unknown protein [Arabidopsis thaliana] TAIR:AT2G19350.1); similar to hypothetical protein [Vitis vinifera] (GB:CAN75495.1); contains InterPro domain Protein of unknown function DUF872, eukaryotic (InterPro:IPR008590)
LG02-eSNP0872	105.8	HR864087	54	6e-08	EEF33916.1	ubiquitin-conjugating enzyme E2 G,putative	52	3e-07	jgi|Poptr1_1|656076	grail3.0049019201	50	9e-07	AT3G46460.1	chr3:17107105-17108300	UBC13 (ubiquitin-conjugating enzyme 13); ubiquitin-protein ligase
LG02-eSNP0169	107.9	HR864027					76	2e-14	jgi|Poptr1_1|835910	fgenesh4_pm.C_LG_XVIII0287	76	2e-14	AT5G59970.1	chr5:24163578-24163889	histone H4
LG02-eSNP0888	116.3	HR864161	73	2e-13	EEF32185.1	tryptophanyl-tRNA synthetase, putative	72	4e-13	jgi|Poptr1_1|721365	Genewise1_v1.C_LG_IX0414	72	3e-13	AT3G04600.3	chr3:1243158-1245964	tryptophanyl-tRNA synthetase, putative
LG02-eSNP0056	116.3	HR863993	116	1e-26	EEF38305.1	protein binding protein, putative	100	1e-21	jgi|Poptr1_1|576461	eugene3.00160596	85	4e-17	AT5G22000.3	chr5:7277439-7279556	CIC7E11; protein binding /zinc ion binding
LG02-eSNP0081	122.5	HR864003	103	9e-23	EEF34993.1	protein with unknown function	102	3e-22	jgi|Poptr1_1|824281	fgenesh4_pg.C_LG_XIV0898	101	3e-22	AT2G31680.1	chr2:13480858-13482034	AtRABA5d (Arabidopsis Rab GTPase homolog A5d); GTP binding
LG03-eSNP0271	0	HR864055	83	2e-16	EEF48692.1	dihydroflavonal-4-reductase, putative					53	2e-07	AT1G16720.1	chr1:5723154-5726241	HCF173 (HIGH CHLOROPHYLL FLUORESCENCE PHENOTYPE 173); binding / catalytic/oxidoreductase/ transcription repressor
LG03-eSNP0870	57	HR864159	120	9e-28	EEF42516.1	pectin acetylesterase, putative	101	4e-22	jgi|Poptr1_1|827491	fgenesh4_pg.C_860138	91	5e-19	AT4G19410.1	chr4:10582199-10584777	pectinacetylesterase, putative
LG03-Jatr1048	57	EU664974	76	2e-14	EEF42560.	ATP-dependent clp protease ATP-binding subunitclpx, putative	74	7e-14	jgi|Poptr1_1|297302	gw1.86.193.1	69	3e-12	AT1G33360.1	chr1:12092091-12095769	ATP-dependent Clp protease ATP-binding subunit ClpX, putative
LG03-eSNP0101	52.8	HR864138	65	3e-11	EEF42448.1	conserved hypothetical protein	69	3e-12	jgi|Poptr1_1|836933	fgenesh4_pm.C_1180018
LG03-eSNP0898	52.8	HR864092	149	1e-36	EEF44660.1	conserved hypothetical protein	139	1e-33	jgi|Poptr1_1|574507	eugene3.00190981	107	8e-24	AT1G06950.1	chr1:2130302-2135562	TTIC110/TIC110(TRANSLOCON AT THE INNER ENVELOPE MEMBRANE OF CHLOROPLASTS 110)
LG03-eSNP0283	62.2	HR864061	62	2e-10	EEF40932.1	tRNA, putative	49	3e-06	jgi|Poptr1_1|835969	fgenesh4_pm.C_LG_XVIII0380	47	7e-06	AT5G14600.1	chr5:4707521-4709025	similar to unnamed protein product [Vitis vinifera] (GB:CAO14741.1); contains InterPro domain tRNA methyltransferase complex GCD14 subunit (InterPro:IPR014816)
LG03-OLE-II-1	64.3	HR864116	116	1e-26	EEF40948.1	Oleosin1	131	4e-31	jgi|Poptr1_1|641631	grail3.0054007901	104	4e-23	AT5G40420.1	chr5:16190850-16191968	OLEO2 (OLEOSIN 2)
LG03-eSNP0272	66.4	HR864056	86	2e-17	EEF40969.1	aldose 1-epimerase, putative	83	1e-16	jgi|Poptr1_1|797872	fgenesh4_pm.C_LG_I000875	75	3e-14	AT5G14500.1	chr5:4674506-4676371	aldose 1-epimerase family protein
LG03-Jatr901	74.8	EU664920	47	1e-05	EEF43338.1	conserved hypothetical protein
LG03-Jcuint038	73.7	JF502097	49	2e-06	EEF43338.1	conserved hypothetical protein
LG03-eSNP0061	94.7	HR863997	127	7e-30	EEF34593.1	phosphoglucomutase, putative	125	2e-29	jgi|Poptr1_1|822067	fgenesh4_pg.C_LG_X0989	119	2e-27	AT1G23190.1	chr1:8219935-8224175	phosphoglucomutase, cytoplasmic, putative+R79/ glucose phosphomutase, putative
LG03-KSAI-1	98	HR864114	128	3e-30	EEF42680.1	50 kDa ketoavyl-ACP synthase	124	5e-29	jgi|Poptr1_1|71449	Genewise1_v1.C_LG_IV4414	91	5e-19	AT5G46290.2	chr5:18791666-18793856	KAS I (3-KETOACYL-ACYL CARRIER PROTEIN SYNTHASE I); fatty-acid synthase
LG03-Jatr1054	121.2	JF502076	54	1e-07	EEF40110.1	conserved hypothetical protein	51	5e-07	jgi|Poptr1_1|817806	fgenesh4_pg.C_LG_IV0366
LG03-eSNP0801	122.3	HR864156	167	4e-42	EEF40092.1	60S ribosomal protein L11, putative	167	4e-42	jgi|Poptr1_1|819383	fgenesh4_pg.C_LG_VI1248	165	2e-41	AT5G45775.2	chr5:18582508-18583723	60S ribosomal protein L11 (RPL11D)
LG03-eSNP0028	129.6	HR864130	104	5e-23	EEF43264.1	glutaredoxin, grx, putative	96	1e-20	jgi|Poptr1_1|670978	grail3.0124002401	99	2e-21	AT4G04950.1	chr4:2517880-2519922	thioredoxin family protein
LG03-eSNP0137	130.6	HR864139	163	9e-41	EEF43219.1	transcription factor, putative	153	7e-38	jgi|Poptr1_1|647737	grail3.0093008801	134	5e-32	AT3G15510.1	chr3:5243703-5245044	ATNAC2 (Arabidopsis thaliana NAC domain containing protein 2); transcription factor
LG03-Jatr856	131.7	EU664903	54	1e-07	EEF43237.1	sugar transporter, putative	53	2e-07	jgi|Poptr1_1|800401	fgenesh4_pm.C_LG_IV000088	54	6e-08	AT4G04770.1	chr4:2427996-2429783	ATABC1 (ARABIDOPSIS THALIANA NUCLEOSOME ASSEMBLY PROTEIN 1)
LG03-eSNP0810	141.1	HR864070	84	6e-17	EEF43884.1	Protein sufB, putative	64	6e-11	jgi|Poptr1_1|758422	fgenesh4_pg.C_LG_IV000050
LG03-eSNP0176	142.1	HR864029	172	2e-43	EEF43856.1	5'-adenylylsulfate reductase 1, chloroplastprecursor, putative	173	9e-44	jgi|Poptr1_1|588813	eugene3.02650004	163	2e-40	AT1G62180.1	chr1:22979459-22981130	APR2 (5'ADENYLYLPHOSPHOSULFATE REDUCTASE 2)
LG03-eSNP0204	151.7	HR864042	53	1e-07	EEF38021.1	Plastid-lipid-associated protein, chloroplastprecursor, putative
LG04-eSNP0179	56.2	HR864031	117	6e-27	EEF39447.1	conserved hypothetical protein	87	7e-18	jgi|Poptr1_1|584544	eugene3.01640033	82	3e-16	AT2G07360.1	chr2:3047620-3057096	SH3 domain-containing protein
LG04-eSNP0822	59.3	HR864073	90	1e-18	EEF46031.1	TPR repeat-containing protein R13F6.10,putative	92	3e-19	jgi|Poptr1_1|571859	eugene3.00131223	86	2e-17	AT5G58450.1	chr5:23644052-23649297	binding
LG04-eSNP0811	59.3	HR864071	84	7e-17	EEF35965.1	conserved hypothetical protein	73	1e-13	jgi|Poptr1_1|571952	eugene3.00131316	64	6e-11	AT5G10860.1	chr5:3429174-3430143	CBS domain-containing protein
LG04-eSNP0193	22.2	HR864036	104	5e-23	EEF33696.1	ubiquitin-conjugating enzyme E2, putative	106	1e-23	jgi|Poptr1_1|561006	eugene3.00060965	103	1e-22	AT4G27960.2		UBC9 (UBIQUITIN CONJUGATING ENZYME..)
LG04-Jcuint090	65.6	JF502117	82	3e-16	EEF35260.1	conserved hypothetical protein	68	5e-12	jgi|Poptr1_1|798608	fgenesh4_pm.C_LG_II000297	52	4e-07	AT1G22750.4	chr1:8050900-8052703	similar to unnamed protein product [Vitis vinifera] (GB:CAO67528.1); contains InterPro domain Protein of unknown function DUF1475 (InterPro:IPR009943)
LG04-Jatr972	65.6	EU664948	78	4e-15	EEF35548.1	conserved hypothetical protein	71	5e-13	jgi|Poptr1_1|665756	grail3.0048009501	58	6e-09	AT1G35660.1	chr1:13192721-13197262	binding
LG04-eSNP0247	45.2	HR864048	180	6e-46	EEF28872.1	Cellulose synthase A catalytic subunit6[UDP-forming], putative	182	2e-46	jgi|Poptr1_1|819877	fgenesh4_pg.C_LG_VII0650	173	7e-44	AT4G39350.1	chr4:18297072-18301884	CESA2 (CELLULOSE SYNTHASE 2);cellulose synthase/ transferase, transferring glycosyl groups
LG04-eSNP0030	46.7	HR863984	89	2e-18	EEF38031.1	transcription factor, putative	94	5e-20	jgi|Poptr1_1|651568	grail3.0002026401	51	7e-07	AT5G44080.1	chr5:17756014-17756961	bZIP transcription factor family protein
LG04-Jcuint128	43.6	JF502128	108	4e-24	EEF42101.1	F-box and wd40 domain protein, putative	105	2e-23	jgi|Poptr1_1|551406	eugene3.00020721	103	1e-22	AT1G21650.1	chr1:7592880-7600108	ATP binding
LG04-eSNP0188	37.3	HR864145	104	5e-23	EEF42131.1	nucellin, putative	94	5e-20	jgi|Poptr1_1|551432	eugene3.00020747	84	6e-17	AT1G77480.1	chr1:29119599-29122044	nucellin protein, putative
LG04-eSNP0152	78.2	HR864021	159	1e-39	EEF42112.1	conserved hypothetical protein					156	1e-38	AT1G21680.1	chr1:7613017-7615137	similar to unknown protein [Arabidopsis thaliana] (TAIR:AT1G21670.1); similar to hypothetical protein [Vitis vinifera] (GB:CAN73514.1); similar to unnamed protein product [Vitis vinifera] (GB:CAO61906.1); similar to hypothetical protein OsJ_0127
LG04-eSNP0933	77.1	HR864099	176	8e-45	EEF48429.1	serine hydroxymethyltransferase, putative	160	8e-40	jgi|Poptr1_1|551519	eugene3.00020834	153	7e-38	AT1G36370.1	chr1:13697452-13699788	SHM7 (serine hydroxymethyltransferase 7); glycine hydroxymethyltransferase
LG04-AP2BP-1	80.3	HR863976	63	1e-10	EEF48478.1	DNA binding protein, putative	73	1e-13	jgi|Poptr1_1|209562	gw1.V.4963.1
LG04-ACC-1	87.7	HR863975	164	5e-41	EEF48464.1	Homomeric Acetyl-CoA Carboxylase (Hom-ACCase)	161	4e-40	jgi|Poptr1_1|830215	fgenesh4_pm.C_LG_II0424	148	3e-36	AT1G36160.1	chr1:13535408-13544985	ACC1 (ACETYL-COENZYME A CARBOXYLASE 1); acetyl-CoA carboxylase
LG04-eSNP0157	92.9	HR864142	66	2e-11	EEF48502.1	conserved hypothetical protein	73	1e-13	jgi|Poptr1_1|816345	fgenesh4_pg.C_LG_II0880	53	2e-07	AT1G34630.2	chr1:12685295-12687085	similar to unknown protein [Arabidopsis thaliana] (TAIR:AT5G51150.1); similar to Os03g0190900 [Oryza sativa (japonica cultivar-group)](GB:NP_001049229.1); similar to hypothetical protein OsI_010090 [Oryza sativa (indica cultivar-group)](GB:EAY88857.1); co
LG04-Jcuint298	114.9	JF502166	74	6e-14	EEF52631.1	GTP-binding protein hflx, putative					74	1e-13	AT5G57960.1	chr5:23480359-23483707	GTP-binding family protein
LG04-Jatr854	116	EU664901	76	2e-14	EEF52631.1	GTP-binding protein hflx, putative	47	7e-06	jgi|Poptr1_1|563330	eugene3.00071268	74	7e-14	AT5G57960.1		GTP-binding family protein
LG04-Jatr345	119.1	EU664777	76	2e-14	EEF52727.1	tubulin beta chain, putative	75	3e-14	jgi|Poptr1_1|255245	gw1.XVI.1184.1	76	2e-14	AT1G75780.1	chr1:28455039-28457263	TUB1 (tubulin beta-1 chain); structural molecule
LG05-eSNP0022	14.7	HR863983	107	8e-24	EEF32363.1	xenotropic and polytropic murine leukemia virusreceptor ids-4, putative	85	4e-17	jgi|Poptr1_1|835710	fgenesh4_pm.C_LG_XVII0133	75	4e-14	AT5G15330.1	chr5:4980598-4982046	SPX (SYG1/Pho81/XPR1) domain-containing protein
LG05-eSNP0083	16.8	HR864005	134	6e-32	EEF51521.1	Methylosome subunit pICln, putative	132	2e-31	jgi|Poptr1_1|824873	fgenesh4_pg.C_LG_XV1008	103	7e-23	AT5G62290.2	chr5:25036794-25038198	nucleotide-sensitive chloride conductance regulator (ICln) family protein
LG05-eSNP01164	32.7	HR864012	135	2e-32	EEF28137.1	Stem-specific protein TSJT1, putative	114	5e-26	jgi|Poptr1_1|579495	eugene3.01070081	108	2e-24	AT4G27450.1	chr4:13727671-13728689	similar to unknown protein [Arabidopsis thaliana] (TAIR:AT3G15450.1); similar to unnamed protein product [Vitis vinifera] (GB:CAO39242.1); contains domain G3DSA:3.60.20.10 G3DSA:3.60.20.10); contains domain SSF56235 (SSF56235)
LG05-OLE-III-1	26.3	HR864117	80	8e-16	EEF51616.1	Oleosin 2	91	5e-19	jgi|Poptr1_1|708981	Genewise1_v1.C_LG_I8235	82	4e-16	AT5G51210.1	chr5:20837397-20837932	OLEO3 (OLEOSIN3)
LG05-OLE1-1	41.1	HR864115	65	5e-11	EEF51944.1	Oleosin 18.2 kDa, putative	74	1e-13	jgi|Poptr1_1|422500	gw1.XII.960.1	50	1e-06	AT3G27660.1	chr3:10245088-10246058	OLEO4 (OLEOSIN4)
LG05-BADH-1	43.2	HR864128	127	6e-30	EEF52065.1	betaine-aldehyde dehydrogenase, putative	117	6e-27	jgi|Poptr1_1|666405	grail3.0005005501	113	1e-25	AT1G74920.1	chr1:28142836-28146234	ALDH10A8 (Aldehyde dehydrogenase 10A8); 3-chloroallyl aldehyde dehydrogenase
LG05-Jcuint094	44.2	JF502121	83	1e-16	EEF47795.1	hypothetical protein	51	5e-07	jgi|Poptr1_1|552010	eugene3.00021325	47	7e-06	AT1G26610.1	chr1:9193722-9195089	zinc finger (C2H2 type) family protein
LG05-eSNP0058	45.2	HR863995	170	8e-43	EEF47772.1	chaperone clpb, putative	166	8e-42	jgi|Poptr1_1|742398	Genewise1_v1.C_820051	163	7e-41	AT1G74310.1	chr1:27940376-27943523	ATHSP101 (HEAT SHOCK PROTEIN 101); ATP binding / ATPase
LG05-eSNP0956	55.7	HR864166	153	7e-38	EEF36072.1	ATP binding protein, putative	146	1e-35	jgi|Poptr1_1|566571	eugene3.00101129	104	4e-23	AT2G01210.1	chr2:119508-121733	leucine-rich repeat transmembrane protein kinase, putative
LG05-eSNP0250	63	HR864049	160	6e-40	EEF39230.1	phenylalanyl-tRNA synthetase beta chain,putative	151	4e-37	jgi|Poptr1_1|828230	fgenesh4_pg.C_1450059	156	9e-39	AT1G72550.2	chr1:27323661-27327570	tRNA synthetase beta subunit family protein
LG05-eSNP0893	63	HR864162	119	1e-27	EEF29361.1	conserved hypothetical protein	117	6e-27	jgi|Poptr1_1|831834	fgenesh4_pm.C_LG_VI0173	100	6e-22	AT2G34690.1	chr2:14637504-14638858	ACD11 (ACCELERATED CELL DEATH 11)
LG05-Jcuint264	75.6	JF502157	66	2e-11	EEF32485.1	conserved hypothetical protein	65	3e-11	jgi|Poptr1_1|823125	fgenesh4_pg.C_LG_XI1325	54	8e-08	AT4G20390.1	chr4:11007079-11007880	integral membrane family protein
LG05-eSNP0183	76.6	HR864143	149	1e-36	EEF40917.1	quinone oxidoreductase, putative	150	5e-37	jgi|Poptr1_1|647716	grail3.0093007001	132	2e-31	AT4G21580.3	chr4:11475834-11477526	oxidoreductase, zinc-binding dehydrogenase family protein
LG05-eSNP0808	77.7	HR864069	175	2e-44	EEF30584.1	histone deacetylase 1, 2 ,3, putative	171	3e-43	jgi|Poptr1_1|803954	fgenesh4_pm.C_LG_IX000001	172	2e-43	AT4G38130.2	chr4:17896657-17899051	HD1 (HISTONE DEACETYLASE19)
LG05-eSNP0145	76.6	HR864019	119	1e-27	EEF41777.1	Cell elongation protein diminuto, putative	115	3e-26	jgi|Poptr1_1|822314	fgenesh4_pg.C_LG_X1518	85	4e-17	AT3G19820.2	chr3:6879841-6881622	DWF1 (DIMINUTO 1); catalytic
LG05-eSNP0228	53.6	HR864151	112	2e-25	EEF32502.1	coatomer epsilon subunit, putative	105	2e-23	jgi|Poptr1_1|823128	fgenesh4_pg.C_LG_XI1337	102	2e-22	AT1G30630.1	chr1:10858528-10860155	coatomer protein epsilon subunit family protein / COPE family protein
LG05-eSNP0277	89.3	HR864058	110	7e-25	EEF35357.1	Nuclease S1 precursor, putative	97	8e-21	jgi|Poptr1_1|225480	gw1.X.177.1	90	1e-18	AT1G68290.1	chr1:25600381-25601927	ENDO 2 (ENDONUCLEASE 2); T/G mismatch-specific endonuclease/ endonuclease/ nucleic acid binding / single-stranded DNA specific endodeoxyribonuclease
LG06-eSNP0156	37.7	HR864024	107	6e-24	EEF50124.1	glycyl-tRNA synthetase, putative	130	9e-31	jgi|Poptr1_1|830916	fgenesh4_pm.C_LG_III0547	130	7e-31	AT1G29880.1	chr1:10459646-10462765	glycyl-tRNA synthetase / glycine--tRNA ligase
LG06-eSNP0120	37.7	HR864014	91	6e-19	EEF50104.1	conserved hypothetical protein	93	2e-19	jgi|Poptr1_1|830921	fgenesh4_pm.C_LG_III0552	64	8e-11	AT3G48860.1	chr3:18128604-18131850	similar to unknown protein [Arabidopsis thaliana] (TAIR:AT5G23700.1); similar to unnamed protein product [Vitis vinifera] (GB:CAO68373.1)
LG06-eSNP0123	37.7	HR864016	89	2e-19	EEF50125.1	ubiquinol-cytochrome C reductase iron-sulfursubunit, putative	97	1e-20	jgi|Poptr1_1|712114	Genewise1_v1.C_LG_III1175	64	6e-11	AT5G13430.1	chr5:4305417-4307402	ubiquinol-cytochrome C reductase iron-sulfur subunit, mitochondrial, putative / Rieske iron-sulfur protein, putative
LG06-Jatr826	38.7	EU664886	57	1e-08	EEF50061.1	cytochrome P450, putative
LG06-eSNP0194	36.7	HR864037	149	1e-36	EEF49955.1	ribosomal pseudouridine synthase, putative	146	9e-36	jgi|Poptr1_1|240375	gw1.XIII.624.1	138	3e-33	AT1G56345.1	chr1:21097074-21098119	pseudouridine synthase family protein
LG06-eSNP0161	22	HR864026	87	1e-17	EEF49700.1	Guanine deaminase, putative	86	2e-17	jgi|Poptr1_1|823659	fgenesh4_pg.C_LG_XIII0172	79	2e-15	AT5G28050.1	chr5:10044213-10045759	cytidine/deoxycytidylate deaminase family protein
LG06-eSNP0255	49.2	HR864051	105	3e-23	EEF49740.1	cu/zn superoxide dismutase, putative	102	3e-22	jgi|Poptr1_1|729723	Genewise1_v1.C_LG_XIII1233	96	1e-20	AT1G08830.2	chr1:2827703-2829056	CSD1 (COPPER/ZINC SUPEROXIDE DISMUTASE 1)
LG06-eSNP0823	49.2	HR864074	116	1e-26	EEF49740.1	cu/zn superoxide dismutase, putative	113	1e-25	jgi|Poptr1_1|729723	Genewise1_v1.C_LG_XIII1233	107	6e-24	AT1G08830.2	chr1:2827703-2829056	CSD1 (COPPER/ZINC SUPEROXIDE DISMUTASE 1)
LG06-eSNP0198	26.1	HR864039	152	2e-37	EEF49817.1	mevalonate kinase, putative	131	4e-31	jgi|Poptr1_1|680106	grail3.0674000101	106	1e-23	AT5G27450.2	chr5:9691054-9692978	MK/MVK; mevalonate kinase
LG06-eSNP0177	51.3	HR864030	94	5e-20	EEF49675.1	ribose-5-phosphate isomerase, putative	60	1e-60	jgi|Poptr1_1|294765	gw1.70.218.1	49	2e-06	AT3G04790.1	chr3:1313371-1314201	ribose 5-phosphate isomerase-related
LG06-eSNP0288	53.4	HR864063	169	2e-42	EEF31110.1	dtdp-glucose 4-6-dehydratase, putativ	169	1e-42	jgi|Poptr1_1|595429	eugene3.00700070	157	4e-39	AT5G28840.1	chr5:10862476-10864028	GME (GDP-D-MANNOSE 3',5'-EPIMERASE); GDP-mannose 3,5-epimerase/ NAD binding / catalytic
LG06-Jatr1013	54.4	EU664964	139	1e-33	EEF40405.1	conserved hypothetical protein	125	2e-29	jgi|Poptr1_1|241484	gw1.XIII.1733.1	70	1e-12	AT1G08600.1	chr1:2724565-2733434	ATRX/CHR20; ATP binding / DNA binding / helicase
LG06-Jcuint312	55.4	JF502169	70	1e-12	EEF40421.1	Translational activator GCN1, putative	64	6e-11	jgi|Poptr1_1|573768	eugene3.00190242	67	1e-11	AT1G64790.1	chr1:24068895-24085571	binding
LG06-Jcuint311	59.6	JF502168	113	8e-26	EEF36911.1	nserved hypothetical protein	123	1e-28	jgi|Poptr1_1|573929	eugene3.00190403	95	3e-20	AT1G55340.1	chr1:20656271-20657135	similar to unknown protein [Arabidopsis thaliana] (TAIR:AT3G03880.1); similar to unknown [Populus trichocarpa] (GB:ABK93768.1); contains InterPro domain Protein of unknown function DUF1639 (InterPro:IPR012438)
LG06-eSNP0053	58.6	HR863991	172	2e-43	EEF36692.1	5-methyltetrahydropteroyltriglutamate--homocysteine methyltransferase, putative	160	6e-40	jgi|Poptr1_1|821018	fgenesh4_pg.C_LG_IX0162	161	3e-40	AT3G03780.3	chr3:957609-960747	AtMS2 (Arabidopsis thaliana methionine synthase 2)
LG06-eSNP0867	0	HR864085	169	1e-42	EEF38346.1	conserved hypothetical protein	161	4e-40	jgi|Poptr1_1|807002	fgenesh4_pm.C_LG_XIII000302	135	2e-32	AT5G17640.1	chr5:5811049-5812431	similar to unknown protein [Arabidopsis thaliana] (TAIR:AT1G10020.1); similar to unnamed protein product [Vitis vinifera] (GB:CAO17865.1); similar to hypothetical protein [Vitis vinifera] (GB:CAN65847.1); contains InterPro domain Protein of unknown functi
LG06-eSNP0187	70	HR864034	157	5e-39	EEF34524.1	conserved hypothetical protein	156	1e-38	jgi|Poptr1_1|735668	Genewise1_v1.C_LG_XVI3352	155	2e-38	AT3G54020.1	chr3:20017076-20018998	phosphatidic acid phosphatase-related / PAP2-related
LG06-Jatr865	73.2	EU664906					50	1e-06	jgi|Poptr1_1|799918	fgenesh4_pm.C_LG_III000383	47	1e-05	AT1G63050.1	chr1:23379726-23381843	membrane bound O-acyl transferase (MBOAT) family protein
LG06-Jatr800	77.4	EU664875	77	9e-15	EEF28091.1	protein with unknown function	77	9e-15	jgi|Poptr1_1|829645	fgenesh4_pm.C_LG_I0698	77	1e-14	AT5G59840.1	chr5:24124676-24126275	Ras-related GTP-binding family protein
LG06-Jatr788	100.6	EU664870	168	2e-42	EEF38271.1	zinc finger protein, putative	143	8e-35	jgi|Poptr1_1|256257	gw1.XVI.2196.1	138	2e-33	AT3G52440.1	chr3:19446425-19447168	Dof-type zinc finger domain-containing protein
LG06-Jcuint061	100.6	JF502107	75	4e-14	EEF38277.1	conserved hypothetical protein	75	4e-14	jgi|Poptr1_1|576490	eugene3.00160625	68	4e-12	AT5G16280.1	chr5:5323380-5331348	binding
LG06-Jcuint111	100.6	JF502125									84	6e-17	AT4G23160.1	chr4:12129496-12134097	protein kinase family protein
LG06-eSNP0094	91.1	HR864007	103	1e-22	EEF29840.1	Ricinus communis (Di)nucleoside polyphosphate hydrolase,putative	59	2e-09	jgi|Poptr1_1|593674	eugene3.56210001	56	2e-08	AT3G10620.1	chr3:3320268-3321570	diadenosine 5',5'''-P1,P4-tetraphosphate hydrolase, putative
LG06-SNP12FAD1	111	HR864127	153	1e-37	EEF31658.1	omega-6 desaturase, endoplasmic reticulum	149	1e-36	jgi|Poptr1_1|561258	eugene3.00061217	126	1e-29	AT3G12120.2	chr3:3860598-3861749	FAD2 (FATTY ACID DESATURASE 2)
LG06-Jcuint215	113.1	JF502147	57	1e-08	EEF49530.1	Transcription factor HBP-1b(c1), putative	70	1e-12	jgi|Poptr1_1|825048	fgenesh4_pg.C_LG_XVI0272
LG06-Jatr152	118.3	EU664742	91	5e-19	EEF42885.1	Xyloglucan endotransglucosylase/hydrolaseprotein 14 precursor, putative	94	5e-20	jgi|Poptr1_1|825278	fgenesh4_pg.C_LG_XVI0885	62	2e-10	AT2G36870.1	chr2:15479948-15481709	xyloglucan:xyloglucosyl transferase, putative / xyloglucan endotransglycosylase, putative / endo-xyloglucan transferase, putative
LG06-eSNP0227	127.7	HR864047	114	7e-26	EEF37138.1	dolichyldiphosphatase, putative	105	2e-23	jgi|Poptr1_1|836209	fgenesh4_pm.C_280064	103	9e-23	AT5G03080.1	chr5:721975-722655	phosphatidic acid phosphatase-related / PAP2-related
LG07-eSNP0284	82.9	HR864150	169	1e-42	EEF38600.1	Ubiquinone biosynthesis protein coq-8, putative	167	4e-42	gi|Poptr1_1|815928	fgenesh4_pg.C_LG_II0001	159	2e-39	AT1G79600.1	chr1:29954998-29957409	ABC1 family protein
LG07-eSNP0031	81.8	HR864154	54	8e-08	EEF44514.1	structural molecule, putative
LG07-eSNP0290	80.8	HR863985	106	1e-23	EEF34679.1	glutamate decarboxylase, putative	91	5e-19	jgi|Poptr1_1|569405	eugene3.00120058	87	1e-17	AT3G17760.1	chr3:6078899-6080844	GAD5 (GLUTAMATE DECARBOXYLASE 5); calmodulin binding
LG07-eSNP0902	73.5	HR864064	132	1e-31	EEF44384.1	conserved hypothetical protein	124	6e-29	jgi|Poptr1_1|827167	fgenesh4_pg.C_640223	83.2	1e-16	AT4G28440.1	chr4:14060060-14060976	DNA-binding protein-related
LG07-eSNP0922	68.2	HR864110	112	2e-15	EEF38768.1	Caltractin, putative	108	2e-24	jgi|Poptr1_1|818390	fgenesh4_pg.C_LG_V0513	101	3e-22	AT3G50360.1	chr3:18685403-18686484	ATCEN2 (CENTRIN2); calcium ion binding
LG07-eSNP0807	59.9	HR864097	65	3e-11	EEF37107.1	Histone H1.1, putative	65	3e-11	jgi|Poptr1_1|807195	fgenesh4_pm.C_LG_XIV000005	64	1e-10	AT5G67580.2	chr5:26973069-26974299	ATTRB2/TRB2 (TELOMERE REPEAT BINDING FACTOR 2); DNA binding / transcription factor
LG07-eSNP0200	57.8	HR864068	169	1e-49	EEF35171.1	lyase, putative	166	8e-42	jgi|Poptr1_1|763151	fgenesh4_pg.C_LG_VI001461	152	1e-37	AT2G22620.1	chr2:9611982-9617236	lyase
LG07-eSNP0155	54.7	HR864040	162	2e-40	EEF31697.1	phosphofructokinase, putative	169	1e-42	jgi|Poptr1_1|219726	gw1.VII.4031.1	157	4e-39	AT2G22480.1	chr2:9552750-9555494	phosphofructokinase family protein
LG07-eSNP0184	34.6	HR864023	94	5e-20	EEF28817.1	RING-H2 finger protein ATL precursor, putatuive	56	2e-08	jgi|Poptr1_1|240834	gw1.XIII.1083.1	59	2e-09	AT1G72200.1	chr1:27173597-27174811	zinc finger (C3HC4-type RING finger) family protein
LG07-eSNP0147	31.5	HR864144	52	3e-07	EEF37068.1	Glucan endo-1,3-beta-glucosidase precursor, putative	63	2e-10	jgi|Poptr1_1|592408	eugene3.04210001
LG07-Jcuint033	41.9	HR864141	52	3e-07	EEF37068.1	Glucan endo-1,3-beta-glucosidase precursor, putative	63	2e-10	jgi|Poptr1_1|592408	eugene3.04210001
LG07-Jatr802	27.3	JF502094	82	2e-16	EEF45141.1	conserved hypothetical protein	87	1e-17	jgi|Poptr1_1|294571	gw1.70.24.1	86	2e-17	AT5G64600.1	chr5:25842404-25845157	similar to unknown protein [Arabidopsis thaliana] (TAIR:AT1G22460.1); similar to unnamed protein product [Vitis vinifera] (GB:CAO46424.1); contains InterPro domain Protein of unknown function DUF246, plant (InterPro:IPR004348)
LG07-Jatr845	23.2	EU664876	58	6e-09	EEF30379.1	expressed protein, putative	59	2e-09	jgi|Poptr1_1|824339	fgenesh4_pg.C_LG_XIV1004	51	5e-07	AT2G04845.2	chr2:1702448-1703990	GCN5-related N-acetyltransferase (GNAT) family protein
LG07-eSNP0899	23.2	EU664896					74	6e-14	jgi|Poptr1_1|553134	eugene3.00002449
LG07-eSNP0077	16.9	HR864170	172	1e-43	EEF37772.1	Endosomal P24A protein precursor, putative	167	6e-42	jgi|Poptr1_1|732530	Genewise1_v1.C_LG_XIV3908	164	4e-41	AT4G12650.1	chr4:7468204-7469787	endomembrane protein 70, putative
LG07-eSNP0095	11.7	HR864002	104	5e-23	EEF32550.1	Adaptin ear-binding coat-associated protein, putative	102	3e-22	jgi|Poptr1_1|818729	genesh4_pg.C_LG_V1398	96	2e-20	AT1G03900.1	chr1:991251-992851	ATNAP4 (ARABIDOPSIS THALIANA NON-INTRINSIC ABC PROTEIN 4)
LG07-eSNP0154	14.8	HR864136	81	6e-16	EEF36980.1	U4/U6 small nuclear ribonucleoprotein Prp31,putative	75	3e-14	jgi|Poptr1_1|552316	eugene3.00021631	57	7e-09	AT1G60170.1	chr1:22196673-22198842	EMB1220 (EMBRYO DEFECTIVE 1220)
LG07-eSNP0203	4	HR864022	55	3e-08	EEF37035.1	Signal recognition particle receptor subunitbeta, putative	52	2e-07	jgi|Poptr1_1|642947	grail3.0003016401
LG07-eSNP0930	2.1	HR864041	95	3e-20	EEF27371.1	maintenance of killer 16 (mak16) protein,putative	95	4e-20	jgi|Poptr1_1|421966	1.XII.426.1	83	1e-16	AT1G23280.1	chr1:8260854-8262639	MAK16 protein-related
LG07-eSNP0285	2.1	HR864098	109	2e-24	EEF51840.1	glyceraldehyde 3-phosphate dehydrogenase,putative	113	1e-25	jgi|Poptr1_1|821843	fgenesh4_pg.C_LG_X0484	108	4e-24	AT3G04120.1	chr3:1081084-1083138	GAPC (GLYCERALDEHYDE-3-PHOSPHATE DEHYDROGENASE C SUBUNIT);glyceraldehyde-3-phosphate dehydrogenase
LG07-eSNP0855	0	HR864062	60	1e-09	EEF47436.1	conserved hypothetical protein	49	2e-06	jgi|Poptr1_1|647024	grail3.0047012301
LG08-Jcuint012	0	HR864082	85	4e-17	EEF47497.1	proteasome subunit beta type 5,8, putative	95	3e-20	jgi|Poptr1_1|419163	gw1.VIII.591.1	91	8e-19	AT3G26340.1	chr3:9651837-9653809	20S proteasome beta subunit E, putative
LG08-eSNP0844	3.2	JF502086	77	7e-15	EEF35899.1	dynamin, putative	77	9e-15	jgi|Poptr1_1|816505	fgenesh4_pg.C_LG_II1217	76	2e-14	AT3G60190.1	chr3:22255342-22258626	ADL4/ADLP2/DRP1E/EDR3 (DYNAMIN-LIKE PROTEIN 4); GTP binding / GTPase
LG08-Jatr892	18.9	HR864078	133	8e-32	EEF50301.1	conserved hypothetical protein	99	3e-21	jgi|Poptr1_1|423490	gw1.29.2.1	101	3e-22	AT5G51400.1	chr5:20896010-20897262	similar to unknown protein [Arabidopsis thaliana] (TAIR:AT2G45010.1); similar to unnamed protein product [Vitis vinifera] (GB:CAO42706.1); contains InterPro domain Protein of unknown function Cys-rich (InterPro:IPR006461)
LG08-eSNP0973	17.8	EU664915	55	4e-08	EEF50557.1	ATP binding protein, putative
LG08-eSNP0139	21	HR864108	166	1e-41	EEF50572.1	polygalacturonase, putative	162	1e-40	jgi|Poptr1_1|644497	grail3.0039009101	154	4e-38	AT3G61490.2	chr3:22769414-22771112	glycoside hydrolase family 28 protein /polygalacturonase (pectinase) family protein
LG08-eSNP0949	23	HR864018	121	4e-28	EEF32417.1	ATP binding protein, putative	124	5e-29	jgi|Poptr1_1|755458	fgenesh4_pg.C_LG_II001638	109	1e-24	AT1G01140.3	chr1:64398-67512	CIPK9 (CBL-INTERACTING PROTEIN KINASE 9); kinase
LG08-eSNP0919	21	HR864104	157	5e-39	EEF47115.1	aig1, putative	151	3e-37	jgi|Poptr1_1|834816	fgenesh4_pm.C_LG_XIV0229	134	4e-32	AT5G05000.1	chr5:1474263-1475773	ATTOC34/OEP34 (Translocase of chloroplast 34)
LG08-eSNP0114	27.2	HR864095	162	2e-40	EEF39053.1	Aspartic proteinase nepenthesin-1 precursor, putative	164	4e-41	jgi|Poptr1_1|409495	gw1.II.830.1	151	3e-37	AT1G01300.1	chr1:117065-118522	aspartyl protease family protein
LG08-eSNP0946	22	HR864010	147	5e-36	EEF47104.1	carbon catabolite repressor protein, putative	140	8e-34	jgi|Poptr1_1|245237	gw1.XIV.1980.1	131	4e-31	AT1G02270.1	chr1:443301-446197	endonuclease/exonuclease/phosphatase family protein / calcium-binding EF hand family protein
LG08-Jcuint237	105.7	HR864102	71	5e-13	EEF47123.1	cathepsin B, putative	70	1e-12	jgi|Poptr1_1|644702	grail3.0039026901	60	1e-09	AT4G01610.2	chr4:694857-696937	cathepsin B-like cysteine protease, putative
LG08-eSNP0885	110.9	JF502154	67	1e-11	EEF47184.1	Serine/threonine-protein kinase PBS1, putative	69	2e-12	jgi|Poptr1_1|710514	Genewise1_v1.C_LG_II1773	59	3e-09	AT3G62220.1	chr3:23040251-23041839	serine/threonine protein kinase, putative
LG08-eSNP0901	111.9	HR864089	140	8e-34	EEF41673.1	histone h2a, putative	130	9e-31	jgi|Poptr1_1|729700	Genewise1_v1.C_LG_XIII1180	129	2e-30	AT1G54690.1	chr1:20418274-20418873	G-H2AX/GAMMA-H2AX/H2AXB/HTA3; DNA binding
LG08-eSNP0802	111.9	HR864109					132	1e-31	jgi|Poptr1_1|805058	fgenesh4_pm.C_LG_X000364	133	8e-32	AT1G10520.1	chr1:3465965-3469249	DNA polymerase lambda (POLL)
LG08-Jcuint277	111.9	HR864067	92	2e-19	EEF41678.1	Late embryogenesis abundant protein D-34,putative	74	7e-14	jgi|Poptr1_1|680323	grail3.0070008401	80	1e-15	AT3G22500.1	chr3:7971927-7972872	ATECP31 (late embryogenesis abundant protein ECP31)
LG08-eSNP0190	117.2	JF502161	136	1e-32	EEF42237.1	leucine-rich repeat containing protein,putative	76	2e-14	jgi|Poptr1_1|794378	fgenesh4_pg.C_scaffold_11704000001	71	6e-13	AT1G27180.1	chr1:9439846-9445805	disease resistance protein (TIR-NBS-LRR class), putative
LG08-eSNP0181	117.2	HR864035	166	1e-41	EEF39977.1	pattern formation protein, putative	161	3e-40	jgi|Poptr1_1|258967	gw1.XVII.958.1	140	6e-34	AT1G13980.1	chr1:4789584-4794394	GN (GNOM)
LG08-eSNP0119	120.3	HR864033	139	2e-33	EEF50801.1	initiation factor 5a, putative	134	5e-32	jgi|Poptr1_1|835953	fgenesh4_pm.C_LG_XVIII0351	124	5e-29	AT1G13950.1		EIF-5A (eukaryotic translation initation factor?)
LG08-eSNP0953	124.5	HR864013	154	4e-38	EEF50676.1	acetyl-CoA synthetase, putative	154	3e-38	jgi|Poptr1_1|742418	Genewise1_v1.C_820082	139	2e-33	AT1G55320.2	chr1:20637860-20640325	acyl-activating enzyme 17 (AAE17)
LG08-eSNP0159	62	HR864105	123	1e-28	EEF37483.1	ribosomal protein L5, putative	121	4e-28	jgi|Poptr1_1|827713	fgenesh4_pg.C_1200093	114	5e-26	AT5G39740.1	chr5:15920593-15922413	60S ribosomal protein L5 (RPL5B)
LG08-eSNP0195	73.7	HR864025	104	4e-23	EEF46008.1	ribosomal large subunit pseudouridine synthaseB, putative	58	4e-09	jgi|Poptr1_1|820240	fgenesh4_pg.C_LG_VIII0269	49	3e-06	AT2G39140.1	chr2:16337316-16340231	pseudouridine synthase family protein
LG09-eSNP0112	25.8	HR864038	176	8e-45	EEF31766.1	Stachyose synthase precursor, putative	175	2e-44	jgi|Poptr1_1|582552	eugene3.01400033	174	3e-44	AT1G55740.1	chr1:20839173-20842373	ATSIP1 (ARABIDOPSIS THALIANA SEED IMBIBITION 1); hydrolase, hydrolyzing O-glycosyl compounds
LG09-eSNP0173	26.9	HR864009	49	3e-06	EEF29910.1	glutamyl-tRNA synthetase 1, 2, putative
LG09-eSNP0059	32.1	HR864028	101	4e-22	EEF33583.1	isocitrate dehydrogenase, putative	81	6e-16	jgi|Poptr1_1|819931	fgenesh4_pg.C_LG_VII0812	77	7e-15	AT4G35650.1	chr4:16908589-16909978	isocitrate dehydrogenase, putative / NAD+ isocitrate dehydrogenase, putative
LG09-eSNP0923	12.4	HR863996	174	4e-44	EEF31743.1	aconitase, putative	178	3e-45	jgi|Poptr1_1|585679	eugene3.01810009	172	2e-43	AT4G35830.2	chr4:16973011-16977282	aconitate hydratase, cytoplasmic / citrate hydro-lyase / aconitase (ACO)
LG09-eSNP0954	37.4	HR864164	71	6e-13	EEF30863.1	catalytic, putative	64	8e-11	jgi|Poptr1_1|828859	fgenesh4_pg.C_4620002	62	3e-10	AT4G36195.2	chr4:17127205-17129790	serine carboxypeptidase S28 family protein
LG09-eSNP0963	42.6	HR864106	100	1e-21	EEF30869.1	vacuolar ATP synthase proteolipid subunit 1, 2,3, putative	98	4e-21	jgi|Poptr1_1|710565	Genewise1_v1.C_LG_II1918	99	3e-21	AT1G75630.1	chr1:28404323-28405693	AVA-P4 (vacuolar H+-pumping ATPase 16 kDa proteolipid subunit 4); ATPase
LG09-eSNP0948	5.3	HR864107	166	1e-41	EEF35736.1	Enoyl-CoA hydratase, mitochondrial precursor,putative	156	1e-38	jgi|Poptr1_1|551227	eugene3.00020542	130	5e-31	AT1G06550.1	chr1:2003833-2006563	enoyl-CoA hydratase/isomerase family protein
LG09-Jcuint138	45.7	HR864103	156	9e-39	EEF40859.1	amine oxidase, putative	151	4e-37	jgi|Poptr1_1|831582	fgenesh4_pm.C_LG_V0482	151	3e-37	AT2G43020.1	chr2:17899022-17901517	ATPAO2 (POLYAMINE OXIDASE 2); amine oxidase
LG09-Jcuint166	47.8	JF502130	72	3e-13	EEF47773.1	RNA polymerase-associated protein LEO1,putative	75	3e-14	jgi|Poptr1_1|569930	eugene3.00120583	61	7e-10	AT5G61150.2	chr5:24621072-24624754	VIP4 (VERNALIZATION INDEPENDENCE 4)
LG09-eSNP0938	48.8	JF502140	62	4e-10	EEF45628.1	conserved hypothetical protein	62	3e-10	jgi|Poptr1_1|555836	eugene3.00040549	54	8e-08	AT1G67140.1	chr1:25104679-25121035	binding
LG09-Jcuint010	49.9	HR864101	78	5e-15	EEF48539.1	14-3-3 protein, putative	91	6e-19	jgi|Poptr1_1|580782	eugene3.01230072	85	4e-17	AT5G38480.2	chr5:15427507-15428515	GRF3 (GENERAL REGULATORY FACTOR 3); protein phosphorylated amino acid binding
LG09-eSNP0920	54.1	JF502085					52	4e-07	jgi|Poptr1_1|199031	gw1.IV.4120.1
LG09-KASIII-1	67.6	HR864096	79	2e-15	EEF36292.1	mitochondrial processing peptidase beta subunit,putative	66	2e-11	jgi|Poptr1_1|712876	Genewise1_v1.C_LG_IV0332
LG09-eSNP0180	74.2	HR864113	115	2e-26	EEF32603.1	Ketoacyl-ACP Synthase III (KAS III)	116	1e-26	jgi|Poptr1_1|267168	gw1.127.174.1	81	6e-16	AT1G62640.2	chr1:23196167-23198402	KAS III (3-KETOACYL-ACYL CARRIER PROTEIN SYNTHASE III); 3-oxoacyl-[acyl-carrier-protein] synthase
LG09-eSNP0833	74.2	HR864032	169	2e-42	EEF51175.1	synaptotagmin, putative	172	2e-43	jgi|Poptr1_1|180397	gw1.I.8997.1	161	3e-40	AT4G11610.1	chr4:7013950-7017840	C2 domain-containing protein
LG09-eSNP0138	82.7	HR864076	145	2e-35	EEF51103.1	conserved hypothetical protein	105	2e-23	jgi|Poptr1_1|180512	gw1.I.9112.1	113	8e-26	AT1G12730.1	chr1:4334673-4337607	cell division cycle protein-related
LG10-SNP3FAD-2	13.2	HR864140	65	5e-11	EEF43390.1	Protein ABIL2, putative	70	1e-12	jgi|Poptr1_1|554521	eugene3.00031154	61	7e-10	AT5G42030.1	chr5:16828746-16830315	ABIL4 (ABL INTERACTOR-LIKE PROTEIN 4)
LG10-SNP3FAD-3	13.2	HR864169	83	2e-16	EEF30278.1	Omega-3 fatty acid desaturase, chloroplastprecursor, putative	93	2e-19	jgi|Poptr1_1|831926	fgenesh4_pm.C_LG_VI0352	47	7e-06	AT3G11170.1	chr3:3499965-3502132	FAD7 (FATTY ACID DESATURASE 7); omega-3 fatty acid desaturase
LG10-eSNP0048	14.3	HR864132	89	2e-18	EEF41487.1	Multiple inositol polyphosphate phosphatase 1precursor, putative	80	8e-16	jgi|Poptr1_1|833751	fgenesh4_pm.C_LG_X0716	81	5e-16	AT1G09870.1	chr1:3205819-3208446	histidine acid phosphatase family protein
LG10-eSNP0251	24.7	HR864050	64	6e-11	EEF36743.1	plekhh protein, putative	85	4e-17	jgi|Poptr1_1|765552	fgenesh4_pg.C_LG_VIII000566	79	2e-15	AT5G05710.1	chr5:1715944-1716378	pleckstrin homology (PH) domain-containing protein
LG10-eSNP0063	33.1	HR863998	52	2e-07	EEF36743.1	plekhh protein, putative	73	2e-13	jgi|Poptr1_1|765552	fgenesh4_pg.C_LG_VIII000566	67	7e-12	AT5G05710.1	chr5:1715944-1716378	pleckstrin homology (PH) domain-containing protein
LG10-eSNP0217	47	HR864147	125	2e-29	EEF30706.1	Tyramine N-feruloyltransferase 4/11, putative	113	8e-26	jgi|Poptr1_1|419638	gw1.VIII.1066.1	95	4e-20	AT2G39020.1	chr2:16302470-16303180	GCN5-related N-acetyltransferase (GNAT) family protein
LG10-eSNP0150	48.1	HR864020	101	4e-22	EEF32812.1	vacuolar ATP synthase subunit G plant, putative	99	3e-21	jgi|Poptr1_1|655913	grail3.0049006102	84	9e-17	AT3G01390.2	chr3:150272-150929	VMA10 (VACUOLAR MEMBRANE ATPASE 10)
LG10-eSNP0830	48.1	HR864158	142	2e-34	EEF29632.1	conserved hypothetical protein	140	6e-34	jgi|Poptr1_1|563741	eugene3.00080336	108	4e-24	AT5G13570.1	chr5:4367535-4369995	DCP2/TDT (DECAPPING 2); hydrolase/ m7G(5')pppN diphosphatase/ protein homodimerization
LG10-eSNP0912	53.3	HR864093	124	6e-29	EEF41205.1	catalytic, putative	110	6e-25	jgi|Poptr1_1|820212	fgenesh4_pg.C_LG_VIII0179	94	5e-20	AT1G74300.1		esterase/lipase/thioesterase family protein?
LG10-Jcuint081	54.4	JF502115	72	3e-13	EEF28091.1	protein with unknown function	72	3e-13	jgi|Poptr1_1|829645	fgenesh4_pm.C_LG_I0698	72	3e-13	AT5G59840.1	chr5:24124676-24126275	Ras-related GTP-binding family protein
LG10-Jcuint067	57.5	JF502110	79	2e-15	EEF43723.1	nuclear acid binding protein, putative	67	7e-12	jgi|Poptr1_1|767539	fgenesh4_pg.C_LG_IX000590
LG10-eSNP0098	61.7	HR864137	68	5e-12	EEF43625.1	DNA-directed RNA polymerase II subunit,putative	59	2e-09	jgi|Poptr1_1|201839	gw1.IX.2304.1	63	1e-10	AT2G15430.1	chr2:6740743-6742564	RBP36A (RNA polymerase II 36 kDa polypeptide A); DNA binding / DNA-directed RNA polymerase
LG10-eSNP0073	66.9	HR864000	80	1e-15	EEF43591.1	Methylthioribose kinase, putative	78	5e-15	jgi|Poptr1_1|722326	Genewise1_v1.C_LG_IX2396	60	9e-10	AT1G49820.1	chr1:18446673-18448575	ATMTK; S-methyl-5-thioribose kinase
LG10-Jcuint059	77.3	JF502105	51	5e-07	EEF29967.1	conserved hypothetical protein	49	2e-06	jgi|Poptr1_1|557526	eugene3.00090786
LG10-eSNP0121	74.2	HR864015	169	2e-42	EEF44691.1	ATP-dependent transporter, putative	166	1e-41	jgi|Poptr1_1|725221|	Genewise1_v1.C_LG_X3044	162	2e-40	AT3G54540.1	chr3:20201371-20203542	ATGCN4 (Arabidopsis thaliana general control non-repressible 4)
LG10-eSNP0827	81.5	HR864157	111	3e-25	EEF34529.1	tip120, putative	114	7e-26	jgi|Poptr1_1|827477	fgenesh4_pg.C_860087	105	2e-23	AT2G02560.2	chr2:690344-697341	CAND1 (CULLIN-ASSOCIATED AND NEDDYLATION DISSOCIATED); binding
LG10-eSNP0214	83.6	HR864146	134	5e-32	EEF33097.1	60S ribosomal protein L13, putative	134	4e-32	jgi|Poptr1_1|735426	Genewise1_v1.C_LG_XVI2564	134	6e-32	AT3G49010.5	chr3:18177956-18179032	ATBBC1 (breast basic conserved 1)
LG10-eSNP0877	82.5	HR864088	132	2e-31	EEF33097.1	60S ribosomal protein L13, putative	132	1e-31	jgi|Poptr1_1|735426	Genewise1_v1.C_LG_XVI2564	132	2e-31	AT3G49010.5	chr3:18177956-18179032	ATBBC1 (breast basic conserved 1)
LG10-eSNP0293	90.9	HR864066	105	3e-23	EEF44615.1	fk506 binding protein, putative	87	7e-18	jgi|Poptr1_1|815400	fgenesh4_pg.C_LG_I1894	69	2e-12	AT3G21640.1	chr3:7619032-7621104	TWD1 (TWISTED DWARF 1); FK506 binding / peptidyl-prolyl cis-trans isomerase
LG10-Jcuint039	101.4	JF502098					54	6e-08	jgi|Poptr1_1|590231	eugene3.30290002	53	2e-07	ATCG00190.1	chrC:23111-26329	Chloroplast DNA-dependent RNA polymerase B subunit. The transcription of this gene is regulated by a nuclear encoded RNA polymerase. This gene has been transferred to mitochondrial genome during crucifer evolution.
LG11-eSNP0213	0	HR864044	97	6e-21	EEF46979.1	Triose phosphate/phosphate translocator,non-green plastid, chloroplast precursor, putative	92	2e-19	jgi|Poptr1_1|779025	fgenesh4_pg.C_LG_XVIII000393	89	2e-18	AT4G32390.1	chr4:15636556-15637608	phosphate translocator-related
LG11-eSNP0936	14.7	HR864100	124	5e-29	EEF48237.1	aspartate aminotransferase, putative	126	1e-29	gi|Poptr1_1|835881	fgenesh4_pm.C_LG_XVIII0241	117	6e-27	AT5G19550.1	chr5:6598203-6601599	ASP2 (ASPARTATE AMINOTRANSFERASE 2)
LG11-KAS-II-1	35.8	HR864112	48	4e-06	EEF46230.1	46 kDa ketoavyl-ACP synthase
LG11-eSNP0051	10.6	HR863989	134	5e-32	EEF48129.1	aspartyl-tRNA synthetase, putative	131	3e-31	jgi|Poptr1_1|745198	Genewise1_v1.C_1450168	127	6e-30	AT1G70980.1	chr1:26766001-26768056	SYNC3; ATP binding / aminoacyl-tRNA ligase/ asparagine-tRNA ligase/ aspartate-tRNA ligase/ nucleic acid binding / nucleotide binding
LG11-DGCT1-1	25.6	HR863980	65	5e-11	EEF48086.1	type 1 diacylglycerol acyltransferase
LG11-D8SPDE-1	38.9	HR863979	156	1e-38	EEF45771.1	fatty acid desaturase, putative	150	6e-37	jgi|Poptr1_1|561655	eugene3.00061614	130	9e-31	AT2G46210.1	chr2:18984615-18985964	delta-8 sphingolipid desaturase, putative
LG11-eSNP0057	41	HR863994	146	9e-36	EEF45857.1	conserved hypothetical protein	49	3e-06	jgi|Poptr1_1|413030	gw1.III.133.1	125	3e-29	AT5G16780.1	chr5:5517787-5521569	SART-1 family protein
LG11-eSNP0829	41	HR864075	108	3e-24	EEF46126.1	peroxisome assembly protein, putative	78	5e-15	jgi|Poptr1_1|717083	Genewise1_v1.C_LG_VI0901	90	1e-18	AT2G26350.1	chr2:11224845-11227493	PEX10 (PEROXIN 10); protein binding / zinc ion binding
LG11-eSNP0879	41	HR864160	123	1e-28	EEF48153.1	profilin, putative	124	5e-29	jgi|Poptr1_1|653969	grail3.0013025102	111	3e-25	AT2G19760.1	chr2:8524156-8525149	PFN1/PRF1 (PROFILIN 1); actin binding
LG11-Jcuint150	43.1	JF502133	122	2e-28	EEF45775.1	serine-threonine protein kinase, plant-type,putative	108	3e-24	jgi|Poptr1_1|417754	gw1.VI.2127.1	71	5e-13	AT1G68400.1	chr1:25650064-25652579	leucine-rich repeat transmembrane protein kinase, putative
LG11-6FAD-1	47.3	HR863974	114	4e-26	EEF29426.1	Omega-6 fatty acid desaturase, chloroplastprecursor, putative					55	4e-08	AT5G57960.1	chr5:23480359-23483707	FAD6 (FATTY ACID DESATURASE 6); omega-6 fatty acid desaturase
LG11-eSNP0854	58.8	HR864081	99	2e-21	EEF32826.1	receptor for activated protein kinase C,putative	110	9e-25	jgi|Poptr1_1|834267	fgenesh4_pm.C_LG_XII0164	99	3e-21	AT1G48630.1	chr1:17985645-17986936	guanine nucleotide-binding family protein / activated protein kinase C receptor, putative / RACK, putative
LG11-eSNP0042	55.7	HR864131	76	2e-14	EEF44149.1	cation-transporting atpase plant, putative	71	5e-13	jgi|Poptr1_1|652846	grail3.0023006701	74	6e-14	AT4G29900.1	chr4:14611231-14618781	ACA10 (autoinhibited Ca2+ -ATPase 10); calcium-transporting ATPase/ calmodulin binding
LG11-eSNP0052	56.7	HR863990	110	9e-25	EEF39165.1	transcription factor btf3, putative	104	5e-23	jgi|Poptr1_1|743498	Genewise1_v1.C_1220145	102	2e-22	AT1G73230.1	chr1:27544167-27545025	nascent polypeptide-associated complex (NAC) domain-containing protein
LG11-eSNP0074	63	HR864001	156	9e-39	EEF34665.1	peptidase, putative	164	3e-41	jgi|Poptr1_1|826057	fgenesh4_pg.C_LG_XVIII1200	147	5e-36	AT2G19170.1	chr2:8321236-8324702	SLP3 (Subtilisin-like serine protease 3); subtilase
LG11-eSNP0851	64	HR864080	93	2e-19	EEF38201.1	NEDD8-activating enzyme E1 regulatory subunit,putative	95	4e-20	jgi|Poptr1_1|807616	fgenesh4_pm.C_LG_XIV000426	92	3e-19	AT1G05180.1	chr1:1498356-1501774	AXR1 (AUXIN RESISTANT 1); small protein activating enzyme
LG11-eSNP0219	65	HR864046	112	1e-25	EEF47115.1	aig1, putative	107	8e-24	jgi|Poptr1_1|816660	fgenesh4_pg.C_LG_II1667	100	1e-21	AT1G02280.2	chr1:448665-450246	TOC33 (PLASTID PROTEIN IMPORT 1)
LG11-FATB-1	74.4	HR864111	105	2e-23	EEF47013.1	palmitoyl-acyl carrier protein thioesterase	112	2e-25	jgi|Poptr1_1|831973	fgenesh4_pm.C_LG_VI0445	85	3e-17	AT1G08510.1	chr1:2691549-2693412	FATB (FATTY ACYL-ACP THIOESTERASES B); acyl carrier/ acyl-ACP thioesterase
LG11-eSNP0258	70.3	HR864152	166	1e-41	EEF45947.1	conserved hypothetical protein					159	2e-39	AT2G25660.1	chr2:10923534-10934468	EMB2410 (EMBRYO DEFECTIVE 2410)
LG11-eSNP0931	79.7	HR864165	186	1e-47	EEF47004.1	ran, putative	186	1e-47	jgi|Poptr1_1|717966	Genewise1_v1.C_LG_VI2910	186	1e-47	AT5G20010.1	chr5:6760366-6761749	RAN-1 (RAS RELATED NUCLEAR PROTEIN); GTP binding
LG11-Jatr719	84.9	EU664846	96	1e-20	EEF42992.1	NAC domain-containing protein, putative
